# Supplementary material
Source: ML conference proceedings conference paper supplement (https://openaccess.thecvf.com/content/ACCV2020/html/Vojir_Efficient_Large-Scale_Semantic_ACCV_2020_paper.html)
Supplement: Supplementary file 1 [file Vojir_Efficient_Large-Scale_Semantic_ACCV_2020_supplemental.zip]

Archive with 5 entries (5 files):
- 0420-supp.pdf
- single_point_loc_videos_Cambridge.mp4
- single_point_loc_videos_SanFrancisco.mp4
- trajectory_loc_videos_SanFrancisco.mp4
- trajectory_loc_videos_Cambridge.mp4
